# Supplementary material for: Ocean Acidification Accelerates the Growth of Two Bloom-Forming Macroalgae
Source: PLOS journal article supplement (doi:10.1371/journal.pone.0155152), 2016-05-13
Supplement: S4 (10.1371/journal.pone.0155152.s004) [file journal.pone.0155152.s004]

Supporting Information for: Ocean acidification accelerates the growth of two bloom-forming, estuarine macroalgae

Craig S. Young and Christopher J. Gobler

Supplementary Tables

**S4 Tables.** Tissue nitrogen content (g N per g dry tissue), tissue carbon content (g N per g dry tissue), and tissue C:N of dry tissue samples of *Gracilaria* and *Ulva* for August through November experiments. Values represent means  $\pm$  SE.

***Gracilaria***

Tissue nitrogen content

| Treatment                  | August            | Early September   | Late September    | Early October     | Late October      | November          |
|----------------------------|-------------------|-------------------|-------------------|-------------------|-------------------|-------------------|
| Control                    | 0.021 $\pm$ 0.002 | 0.027 $\pm$ 0.002 | 0.031 $\pm$ 0.004 | 0.033 $\pm$ 0.001 | 0.035 $\pm$ 0.002 | 0.032 $\pm$ 0.001 |
| Nutrients                  | 0.021 $\pm$ 0.001 | 0.033 $\pm$ 0.001 | 0.033 $\pm$ 0.002 | 0.034 $\pm$ 0.001 | 0.036 $\pm$ 0.001 | 0.035 $\pm$ 0.001 |
| CO <sub>2</sub>            | 0.021 $\pm$ 0.004 | 0.028 $\pm$ 0.001 | 0.031 $\pm$ 0.004 | 0.034 $\pm$ 0.001 | 0.035 $\pm$ 0.002 | 0.027 $\pm$ 0.002 |
| CO <sub>2</sub> /Nutrients | 0.027 $\pm$ 0.002 | 0.031 $\pm$ 0.001 | 0.034 $\pm$ 0.001 | 0.033 $\pm$ 0.001 | 0.034 $\pm$ 0.001 | 0.032 $\pm$ 0.002 |

Tissue carbon content

| Treatment                  | August            | Early September   | Late September    | Early October     | Late October      | November          |
|----------------------------|-------------------|-------------------|-------------------|-------------------|-------------------|-------------------|
| Control                    | 0.308 $\pm$ 0.022 | 0.315 $\pm$ 0.009 | 0.293 $\pm$ 0.019 | 0.291 $\pm$ 0.001 | 0.311 $\pm$ 0.017 | 0.303 $\pm$ 0.006 |
| Nutrients                  | 0.225 $\pm$ 0.015 | 0.321 $\pm$ 0.015 | 0.263 $\pm$ 0.008 | 0.298 $\pm$ 0.009 | 0.317 $\pm$ 0.015 | 0.278 $\pm$ 0.008 |
| CO <sub>2</sub>            | 0.280 $\pm$ 0.022 | 0.330 $\pm$ 0.001 | 0.284 $\pm$ 0.013 | 0.322 $\pm$ 0.008 | 0.303 $\pm$ 0.003 | 0.275 $\pm$ 0.014 |
| CO <sub>2</sub> /Nutrients | 0.298 $\pm$ 0.014 | 0.316 $\pm$ 0.017 | 0.292 $\pm$ 0.009 | 0.302 $\pm$ 0.011 | 0.310 $\pm$ 0.005 | 0.278 $\pm$ 0.016 |

Tissue C:N

| Treatment                  | August         | Early September | Late September | Early October  | Late October   | November       |
|----------------------------|----------------|-----------------|----------------|----------------|----------------|----------------|
| Control                    | 17.2 $\pm$ 0.3 | 13.6 $\pm$ 0.6  | 11.1 $\pm$ 0.8 | 10.2 $\pm$ 0.1 | 10.5 $\pm$ 1.0 | 11.1 $\pm$ 0.2 |
| Nutrients                  | 12.3 $\pm$ 0.2 | 11.2 $\pm$ 0.5  | 9.3 $\pm$ 0.3  | 10.3 $\pm$ 0.5 | 10.4 $\pm$ 0.5 | 9.4 $\pm$ 0.3  |
| CO <sub>2</sub>            | 15.9 $\pm$ 1.6 | 14.0 $\pm$ 0.5  | 11.1 $\pm$ 0.9 | 11.1 $\pm$ 0.6 | 10.2 $\pm$ 0.5 | 12.1 $\pm$ 0.6 |
| CO <sub>2</sub> /Nutrients | 12.8 $\pm$ 0.6 | 12.1 $\pm$ 0.5  | 10.0 $\pm$ 0.4 | 10.5 $\pm$ 0.1 | 10.5 $\pm$ 0.1 | 10.1 $\pm$ 0.6 |

## *Ulva*

### Tissue nitrogen content

| Treatment                  | August      | Early<br>September | Late<br>September | Early<br>October | Late<br>October | November    |
|----------------------------|-------------|--------------------|-------------------|------------------|-----------------|-------------|
| Control                    | 0.012±0.001 | 0.011±0.001        | 0.015±0.001       | 0.024±0.003      | 0.027±0.001     | 0.023±0.001 |
| Nutrients                  | 0.026±0.001 | 0.018±0.003        | 0.018±0.001       | 0.024±0.003      | 0.025±0.001     | 0.023±0.001 |
| CO <sub>2</sub>            | 0.012±0.001 | 0.012±0.003        | 0.019±0.001       | 0.024±0.001      | 0.025±0.001     | 0.024±0.002 |
| CO <sub>2</sub> /Nutrients | 0.027±0.002 | 0.018±0.001        | 0.019±0.003       | 0.025±0.001      | 0.024±0.001     | 0.022±0.001 |

### Tissue carbon content

| Treatment                  | August      | Early<br>September | Late<br>September | Early<br>October | Late<br>October | November    |
|----------------------------|-------------|--------------------|-------------------|------------------|-----------------|-------------|
| Control                    | 0.302±0.003 | 0.335±0.009        | 0.267±0.003       | 0.295±0.019      | 0.301±0.019     | 0.293±0.011 |
| Nutrients                  | 0.335±0.013 | 0.322±0.007        | 0.282±0.018       | 0.309±0.013      | 0.320±0.003     | 0.306±0.010 |
| CO <sub>2</sub>            | 0.295±0.005 | 0.327±0.009        | 0.268±0.034       | 0.306±0.011      | 0.286±0.011     | 0.300±0.010 |
| CO <sub>2</sub> /Nutrients | 0.313±0.017 | 0.321±0.016        | 0.282±0.011       | 0.317±0.013      | 0.322±0.004     | 0.304±0.007 |

### Tissue C:N

| Treatment                  | August   | Early<br>September | Late<br>September | Early<br>October | Late<br>October | November |
|----------------------------|----------|--------------------|-------------------|------------------|-----------------|----------|
| Control                    | 29.3±2.8 | 36.7±2.0           | 21.5±1.9          | 14.5±0.8         | 12.9±0.3        | 14.7±0.3 |
| Nutrients                  | 15.3±0.6 | 21.9±2.9           | 18.0±0.7          | 15.3±1.2         | 15.2±0.4        | 15.8±0.5 |
| CO <sub>2</sub>            | 29.8±3.2 | 35.1±6.3           | 16.5±1.1          | 14.7±0.5         | 13.5±0.8        | 14.8±1.4 |
| CO <sub>2</sub> /Nutrients | 13.8±0.5 | 21.2±1.7           | 19.0±3.7          | 15.1±0.5         | 15.6±0.1        | 15.8±0.4 |
